# Supplementary material for: Multipoint Layout Planning Method for Multienergy Sources Based on Complex Adaptive System Theory
Source: Hindawi journal article supplement (doi:10.1155/2022/8948177), 2022-07-05
Supplement: f1 [file 8948177.f1.docx]

Appendices

Calculation flow diagram

Table A1 Random scenario planning scheme MW

| Power  node | Wind  power | Photovoltaic  power | Hydro  power | Thermal  power | Solar thermal power |
| --- | --- | --- | --- | --- | --- |
| 2 | 600 | 4300 | 10×50 | 3×300 | 100 |
| 3 | 0 | 0 | 0 | 2×600 | 0 |
| 5 | 0 | 200 | 2×50 | 0 | 0 |
| 6 | 0 | 0 | 4×320 | 0 | 0 |
| 11 | 0 | 0 | 0 | 2×300 | 0 |
| 15 | 1450 | 3100 | 10×100 | 0 | 100 |
| 18 | 0 | 0 | 5×10 | 2×150 | 0 |
| 20 | 0 | 0 | 2×50 | 2×300 | 0 |
| 22 | 0 | 0 | 5×700 | 0 | 0 |
| 25 | 0 | 0 | 4×400 | 0 | 0 |
| 26 | 0 | 500 | 10×50 | 0 | 0 |
| 28 | 0 | 0 | 10×300 | 0 | 0 |

Table A2 Clustering scenario planning scheme MW

| Power  node | Wind  power | Photovoltaic  power | Hydro  power | Thermal  power | Solar thermal power |
| --- | --- | --- | --- | --- | --- |
| 2 | 800 | 5900 | 10×50 | 3×300 | 100 |
| 3 | 0 | 0 | 0 | 2×600 | 0 |
| 5 | 0 | 300 | 2×50 | 0 | 0 |
| 6 | 0 | 0 | 4×320 | 0 | 0 |
| 11 | 0 | 0 | 0 | 2×300 | 0 |
| 15 | 1250 | 1400 | 10×100 | 0 | 100 |
| 18 | 0 | 0 | 5×10 | 2×150 | 0 |
| 20 | 0 | 0 | 2×50 | 2×300 | 0 |
| 22 | 0 | 0 | 5×700 | 0 | 0 |
| 25 | 0 | 0 | 4×400 | 0 | 0 |
| 26 | 0 | 500 | 10×50 | 0 | 0 |
| 28 | 0 | 0 | 10×300 | 0 | 0 |

Table A3 Random scene selection

| Mouth | Wind scene | Light scene |
| --- | --- | --- |
| 1 | 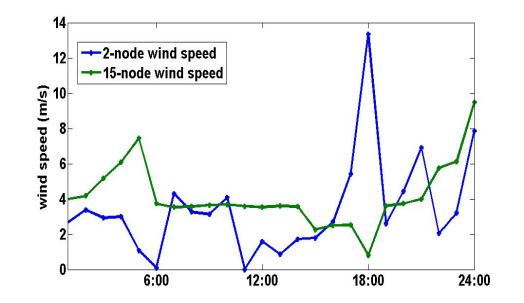 | 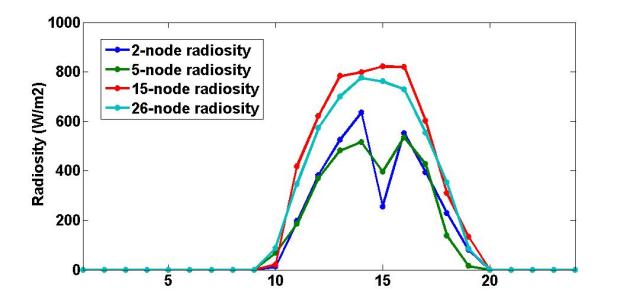 |
| 2 | 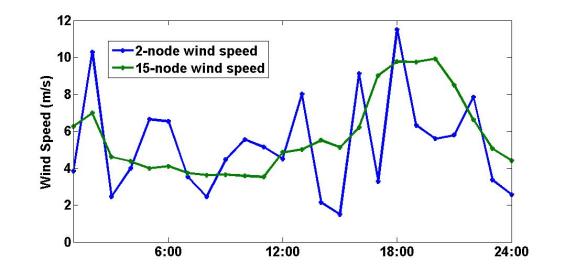 | 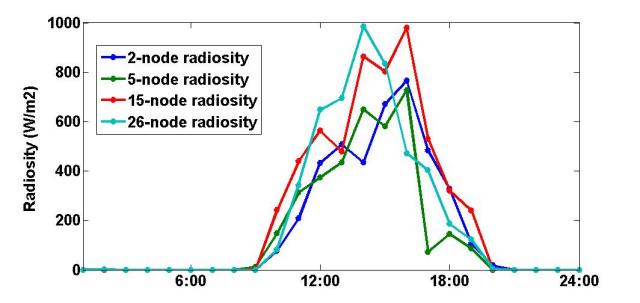 |
| 3 | 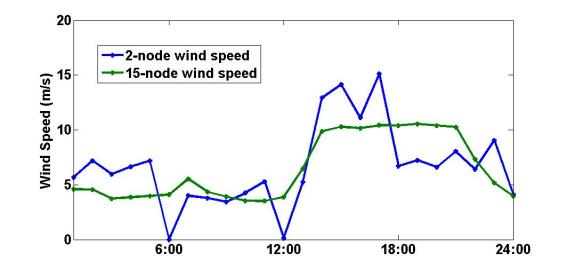 | 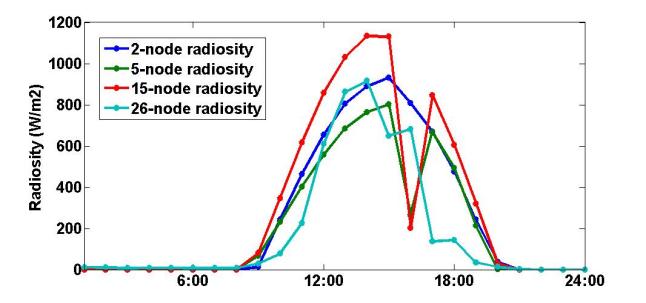 |
| 4 | 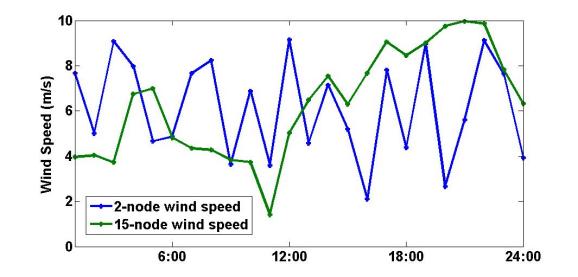 | 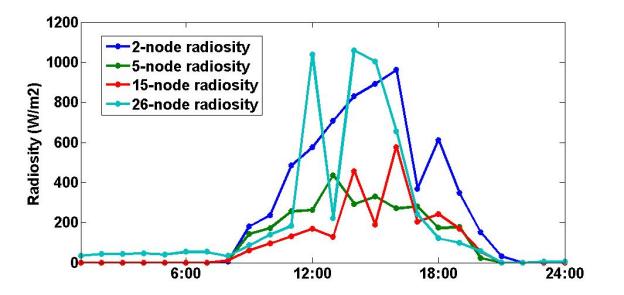 |
| 5 | 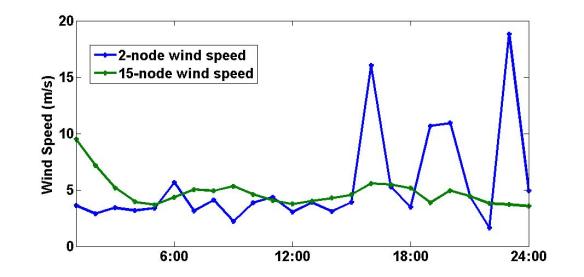 | 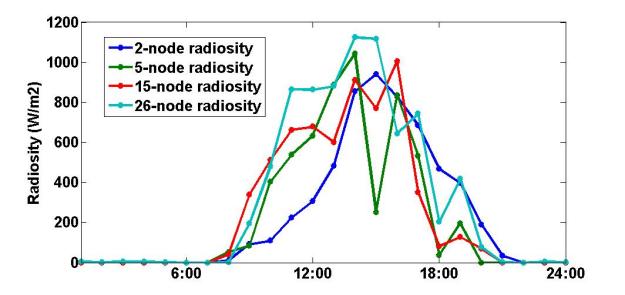 |
| 6 | 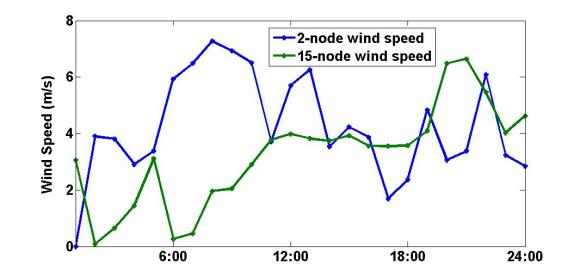 | 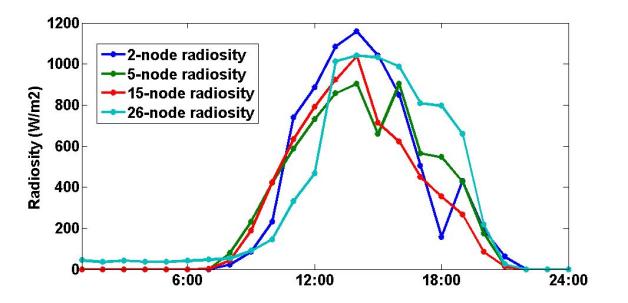 |
| 7 | 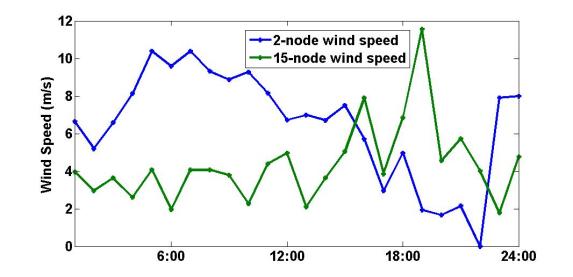 | 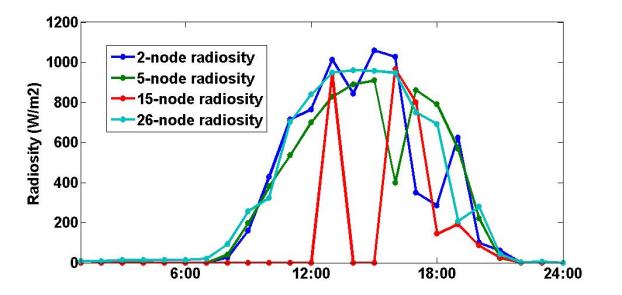 |
| 8 | 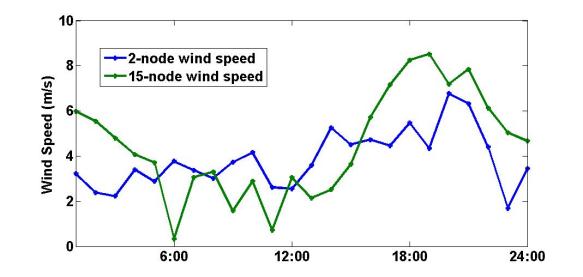 | 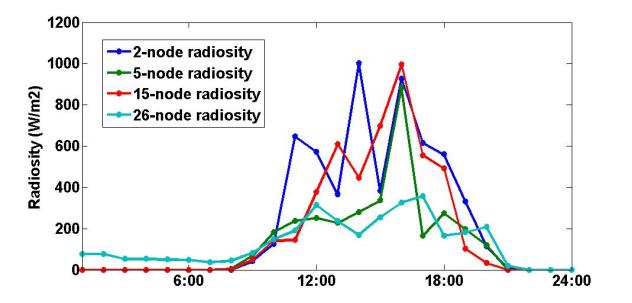 |
| 9 | 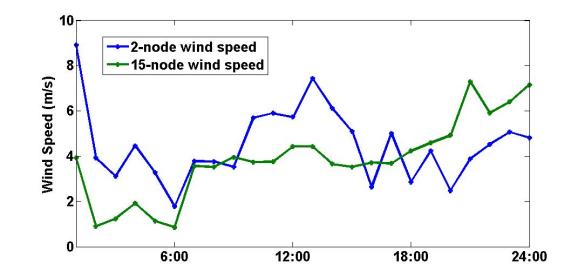 | 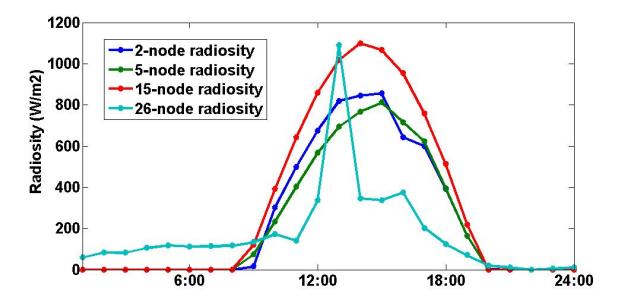 |
| 10 | 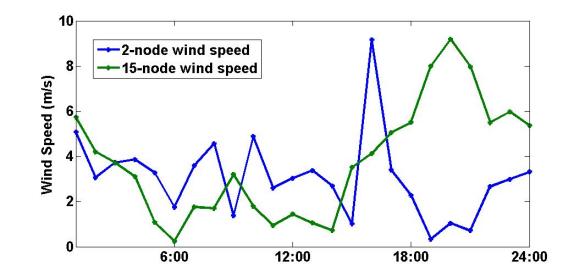 | 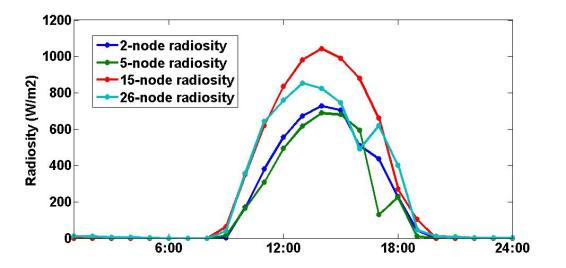 |
| 11 | 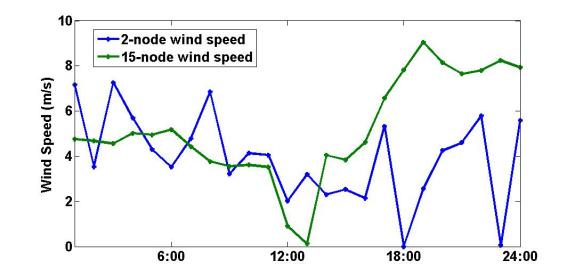 | 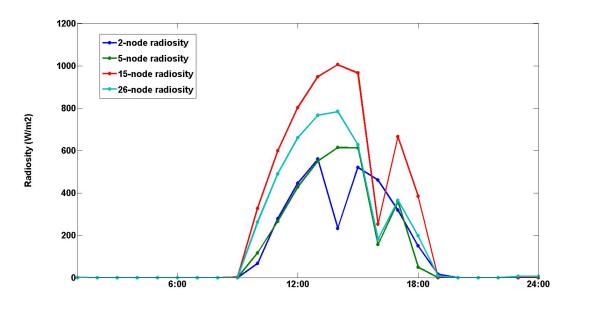 |
| 12 | 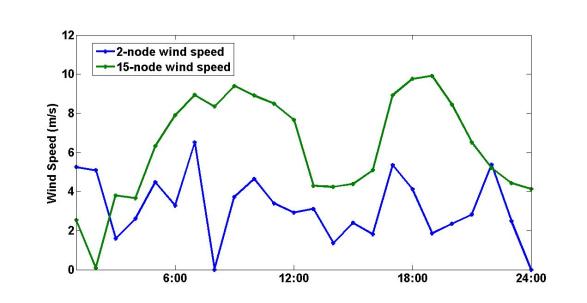 | 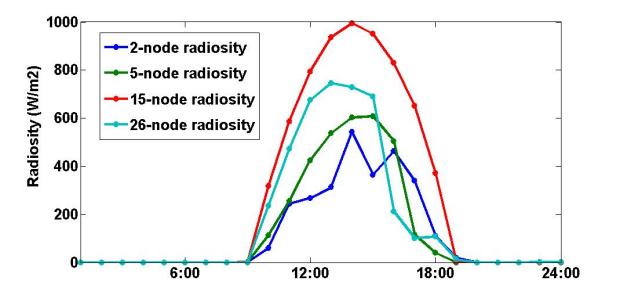 |

Table A4 Clustering scenarios

| Mouth | Wind scene | Light scene |
| --- | --- | --- |
| 1 | 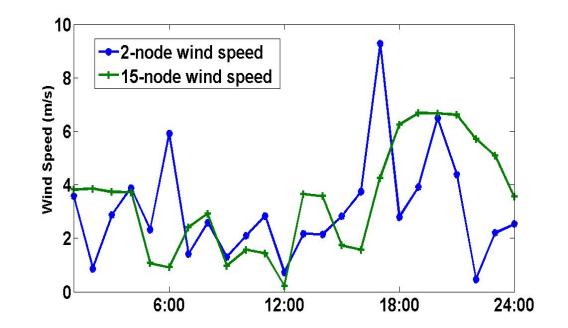 | 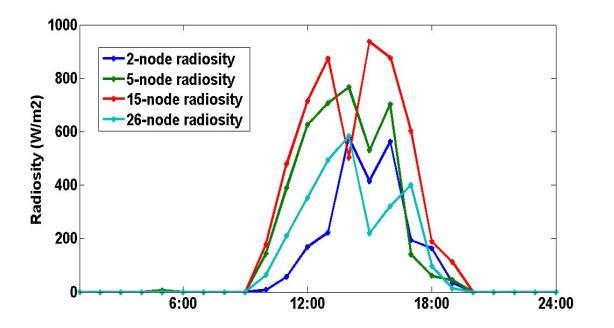 |
| 2 | 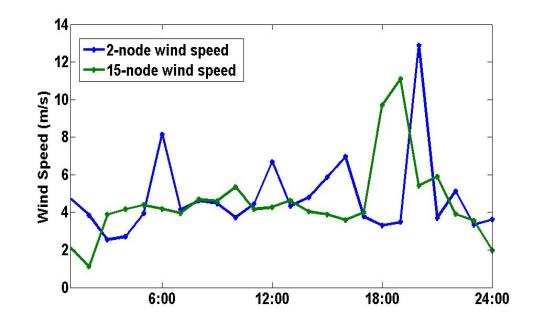 | 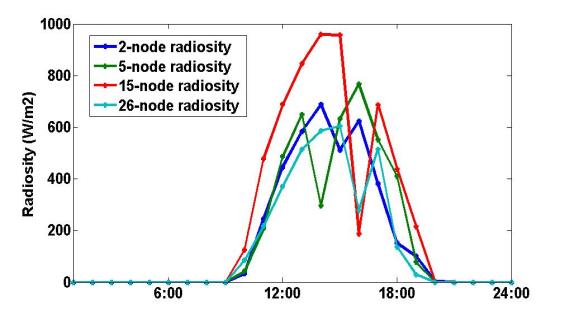 |
| 3 | 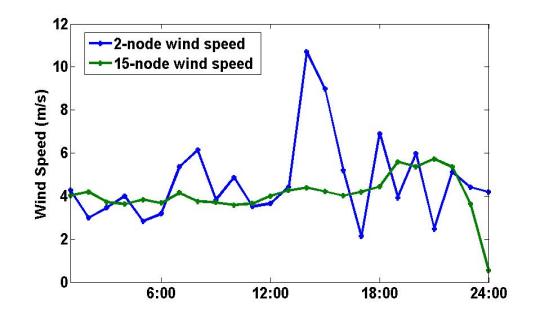 | 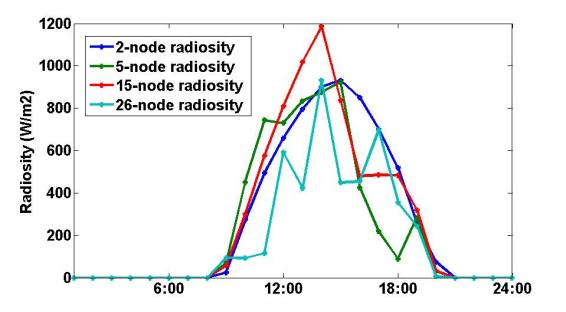 |
| 4 | 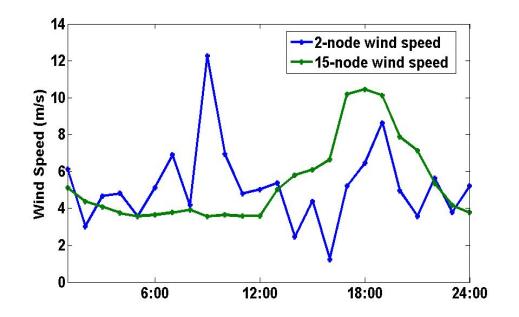 | 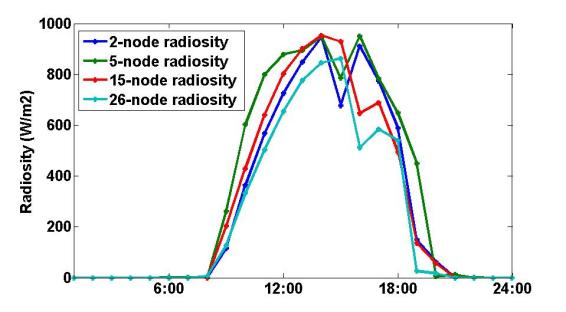 |
| 5 | 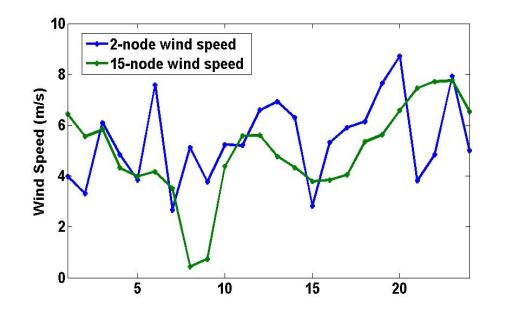 | 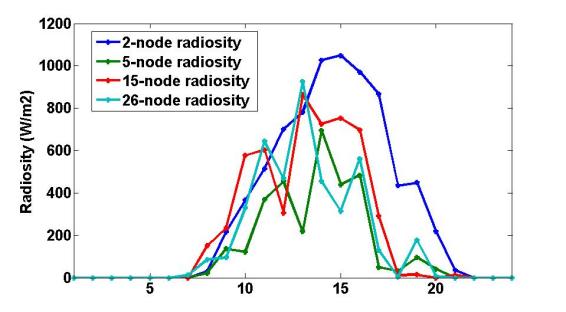 |
| 6 | 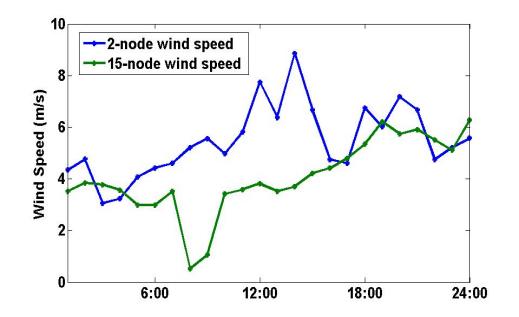 | 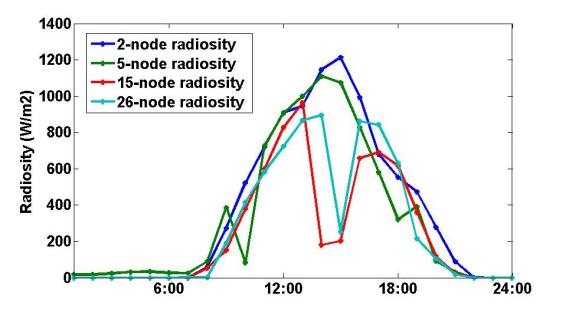 |
| 7 | 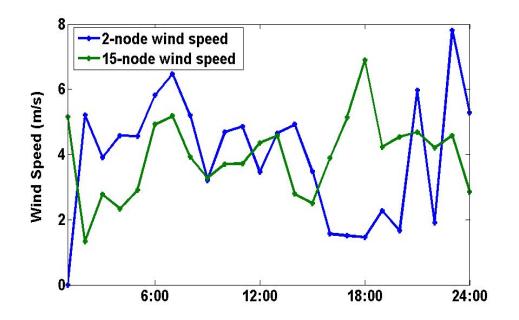 | 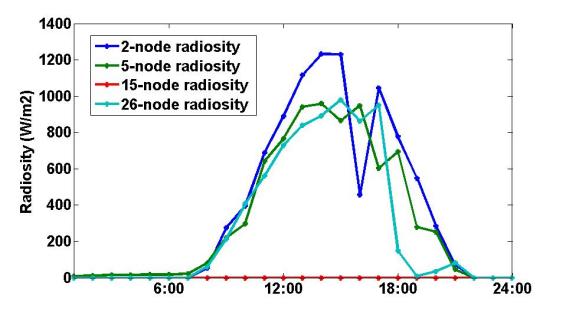 |
| 8 | 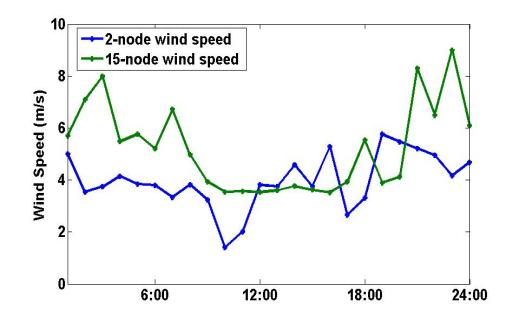 | 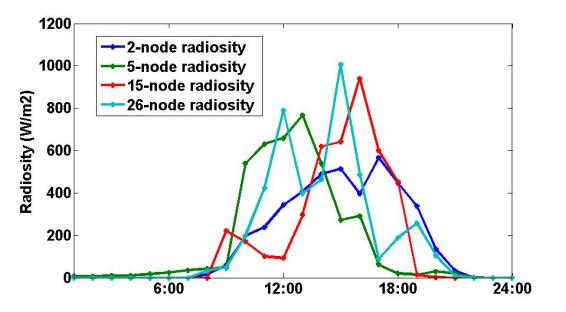 |
| 9 | 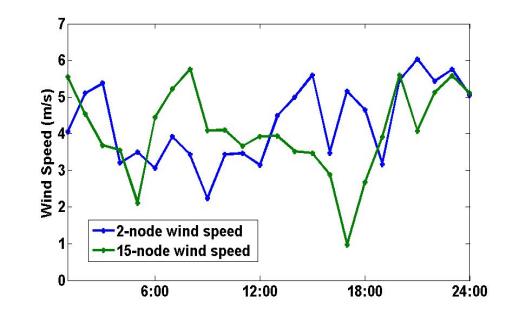 | 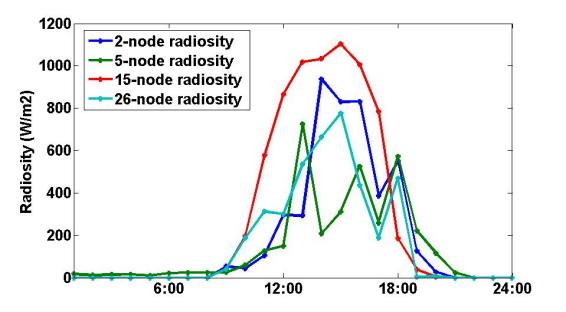 |
| 10 | 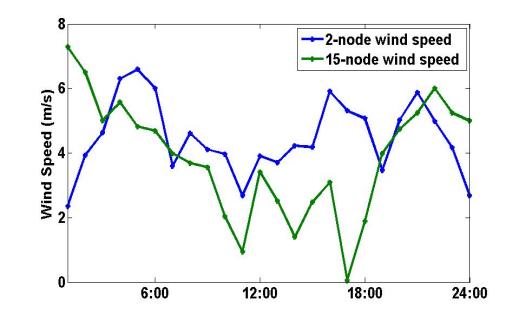 | 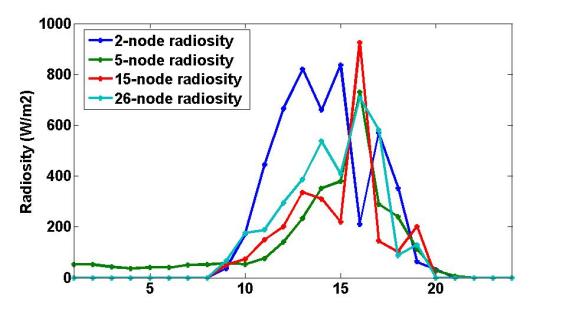 |
| 11 | 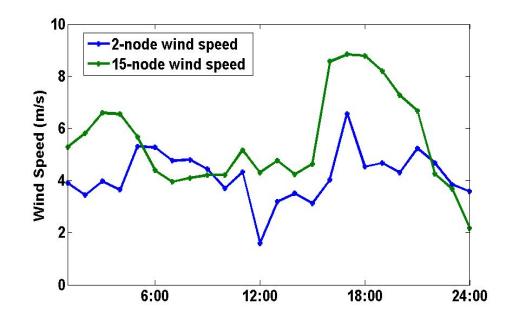 | 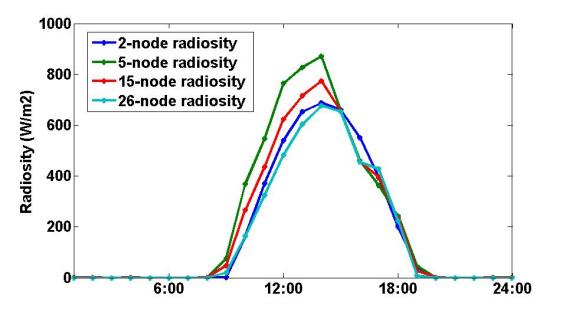 |
| 12 | 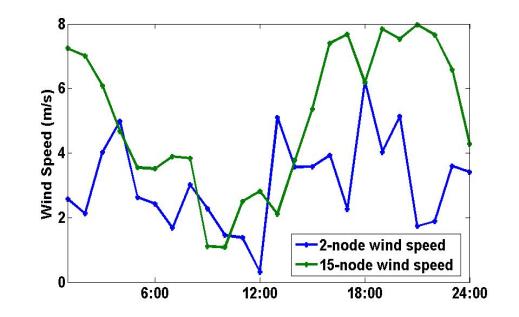 | 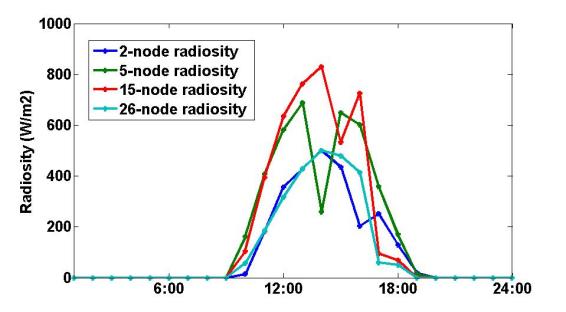 |
